# Supplementary material
Source: publisher figshare collection journal article supplement (https://rs.figshare.com/ndownloader/files/14119820)
Supplement: Supplementary file 1 [file 14119820]

**Title**

Software program

H* Evalution equation of easy magnetization interparticle interaction in 3

D orientation easy axes under Athw=8=,0,A Cos@Ω*tD<; in 3D orientations*L

H* Frist particle

In[5]:= n 1 = 8Sin@Ψ 1 D, 0, Cos@Ψ 1 D<;

In[6]:= hw = 80, 0, h 0 Cos@Ω * tD<;

In[7]:= m 1 = 8Sin@Θ 1 D Cos@j 1 D, Sin@Θ 1 D Sin@j 1 D, Cos@Θ 1 D<;

In[8]:= h dd1 = 9h dx1 , h dy1 , h dz1 =;

H* Evaluation magnetic effect for first particleL

In[9]:= h eff1 = hw + Β n 1 * Dot@m 1 , n 1 D + h dd1

Out[9]= 9Sin@Ψ 1 HCos@Θ 1 Cos@Ψ 1 Cos@j 1 Sin@Θ 1 Sin@Ψ 1 h dx1 , h dy1 ,

Β Cos@Ψ 1 D HCos@Θ 1 D Cos@Ψ 1 D + Cos@j 1 D Sin@Θ 1 D Sin@Ψ 1 DL + Cos@t ΩD h 0 + h dz1 =

In[1]:= FullSimplifyA9Β Sin@Ψ 1 D HCos@Θ 1 D Cos@Ψ 1 D + Cos@j 1 D Sin@Θ 1 D Sin@Ψ 1 DL + h dx1 ,

h dy1 , Β Cos@Ψ 1 D HCos@Θ 1 D Cos@Ψ 1 D + Cos@j 1 D Sin@Θ 1 D Sin@Ψ 1 DL + Cos@t ΩD h 0 + h dz1 =E

h eff1 = 9Β Sin@Ψ 1 D HCos@Θ 1 D Cos@Ψ 1 D + Cos@j 1 D Sin@Θ 1 D Sin@Ψ 1 DL + h dx1 ,

h dy1 , Β Cos@Ψ 1 D HCos@Θ 1 D Cos@Ψ 1 D + Cos@j 1 D Sin@Θ 1 D Sin@Ψ 1 DL + Cos@t ΩD h 0 + h dz1 =;

H* evaluate the RHS from landau Lifishetz equation first particle

H* To Simplyfy calculations we use

In[1]:= h eff1 = 9h efx1 , h efy1 , h efz1 =;

In[2]:= m 1 = 8Sin@Θ 1 D Cos@j 1 D, Sin@Θ 1 D Sin@j 1 D, Cos@Θ 1 D<;

In[3]:= Y1 = -Cross@m 1 , h eff1 D - Λ Cross@m 1 , Cross@m 1 , h eff1 DD

In[5]:= FullSimplifyA9Cos@Θ 1 D h efy1 - Sin@Θ 1 D Sin@j 1 D h efz1 - Λ I-Cos@Θ 1 D 2 h efx1 -

Sin@Θ 1 D 2 Sin@j 1 D 2 h efx1 + Cos@j 1 D Sin@Θ 1 D 2 Sin@j 1 D h efy1 + Cos@Θ 1 D Cos@j 1 D Sin@Θ 1 D h efz1 M,

-Cos@Θ 1 D h efx1 + Cos@j 1 D Sin@Θ 1 D h efz1 - Λ ICos@j 1 D Sin@Θ 1 D 2 Sin@j 1 D h efx1 -

Cos@Θ 1 D 2 h efy1 - Cos@j 1 D 2 Sin@Θ 1 D 2 h efy1 + Cos@Θ 1 D Sin@Θ 1 D Sin@j 1 D h efz1 M,

Sin@Θ 1 D Sin@j 1 D h efx1 - Cos@j 1 D Sin@Θ 1 D h efy1 - Λ ICos@Θ 1 D Cos@j 1 D Sin@Θ 1 D h efx1 +

Cos@Θ 1 D Sin@Θ 1 D Sin@j 1 D h efy1 - Cos@j 1 D 2 Sin@Θ 1 D 2 h efz1 - Sin@Θ 1 D 2 Sin@j 1 D 2 h efz1 M=E

H* Components of RHS from landau Lifishetz equation first particle

In[1]:= R x1 = Λ ICos@Θ 1 D 2 + Sin@Θ 1 D 2 Sin@j 1 D 2 M h efx1 +

ICos@Θ 1 D - Λ Cos@j 1 D Sin@Θ 1 D 2 Sin@j 1 DM h efy1 - Sin@Θ 1 D HΛ Cos@Θ 1 D Cos@j 1 D + Sin@j 1 DL h efz1 ;

In[2]:= R y1 = -ICos@Θ 1 D + Λ Cos@j 1 D Sin@Θ 1 D 2 Sin@j 1 DM h efx1 +

Λ ICos@Θ 1 D 2 + Cos@j 1 D 2 Sin@Θ 1 D 2 M h efy1 + Sin@Θ 1 D HCos@j 1 D - Λ Cos@Θ 1 D Sin@j 1 DL h efz1 ;

In[3]:= R z1 = Sin@Θ 1 D I-Cos@j 1 D IΛ Cos@Θ 1 D h efx1 + h efy1 M + Sin@j 1 D Ih efx1 - Λ Cos@Θ 1 D h efy1 M + Λ Sin@Θ 1 D h efz1 M;

?? ?? ?? ?? ?? ?? ?? ?? ?? ?? ?? ?? ?? ?? ??

H*Evaluate - sin@ΘD HdΘ?dtL= Rz *L

In[4]:= H-1 ? Sin@Θ 1 DL * R z1

In[5]:= FullSimplifyACos@j 1 D IΛ Cos@Θ 1 D h efx1 + h efy1 M - Sin@j 1 D Ih efx1 - Λ Cos@Θ 1 D h efy1 M - Λ Sin@Θ 1 D h efz1 E

Out[5]= Cos@j 1 D IΛ Cos@Θ 1 D h efx1 + h efy1 M + Sin@j 1 D I-h efx1 + Λ Cos@Θ 1 D h efy1 M - Λ Sin@Θ 1 D h efz1

H*Evaluate sin@ΘDHdΦ?dtL= H sin@ΘDLHCos@ΦDRy-Sin@ΦDRx L *L

In[8]:= Cos@j 1 D R y1 - Sin@j 1 D R
